# Supplementary material for: Lineage Divergence and Vector-Specific Adaptation Have Driven Chikungunya Virus onto Multiple Adaptive Landscapes
Source: PubMed Central journal article supplement (PMC8576524; doi:10.1128/mbio.02738-21), 2021-11-09

**Figure S1: Passage of competing viruses in Vero Cells.** All competing groups were mixed in 3 different ratios and passaged in Vero cells in 96 well plates in duplicate for 48 hours. RNA from the initial mix and passaged material purified, amplified via RT-PCR, and restriction digested as described in the materials and methods. Gel lanes are labeled as I for the input and 1 and 2 for the duplicate passages. Proportions of DNA as estimated by GelQuant.NET software are shown in red next to the relevant bands.

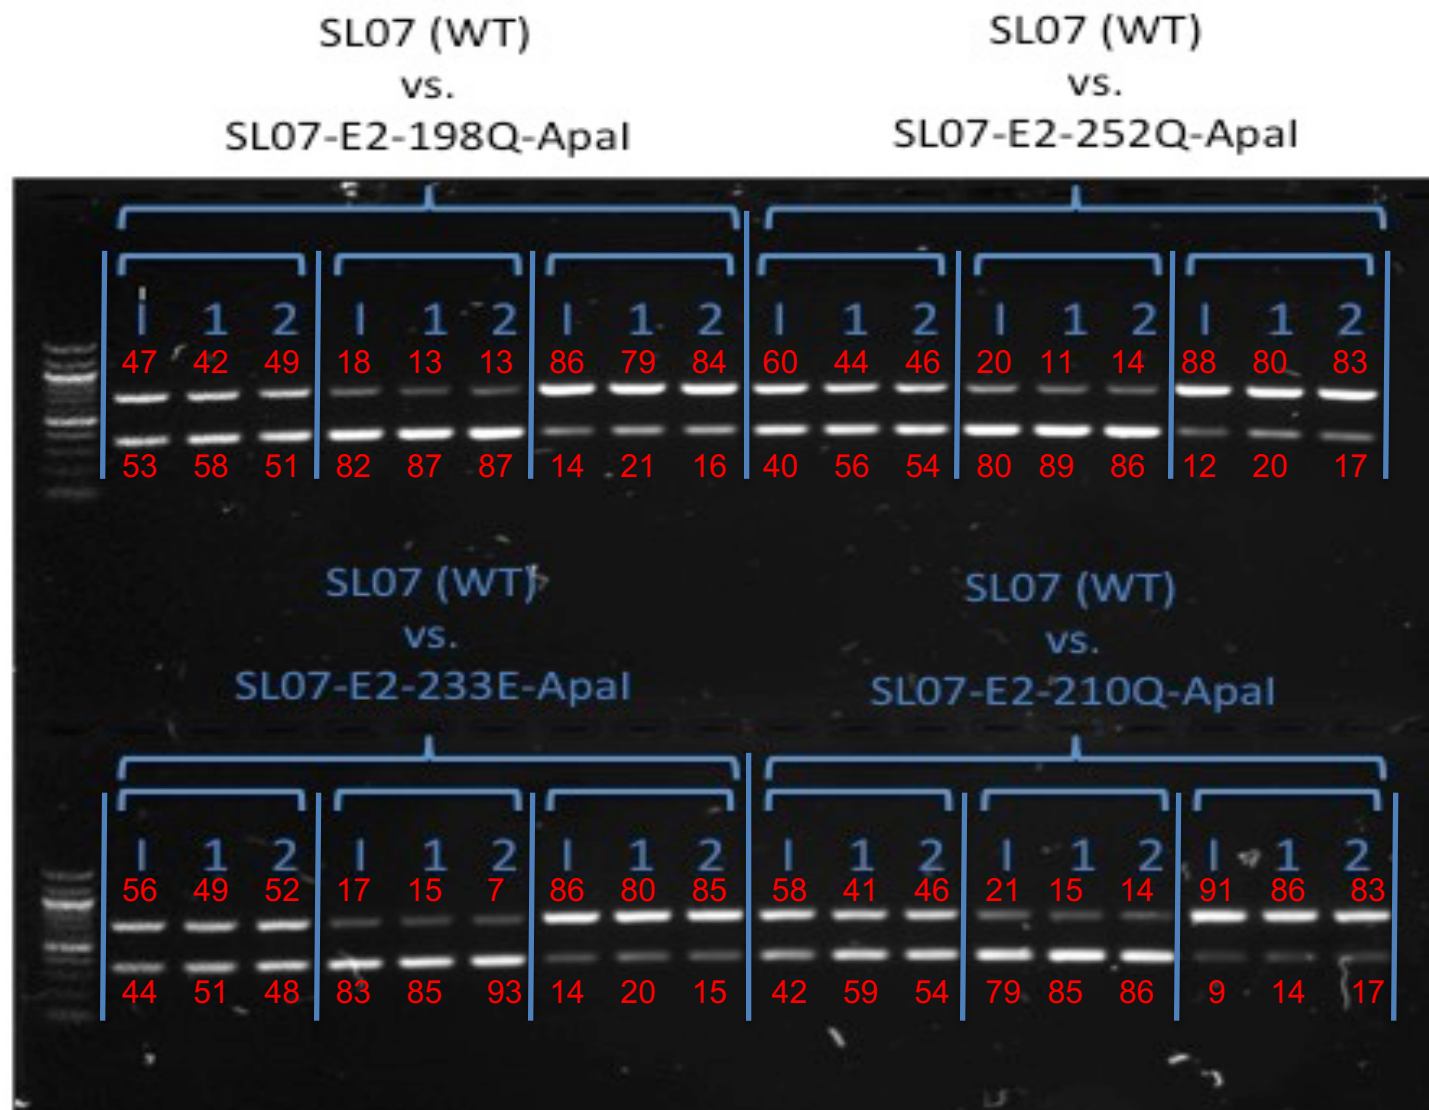

SL07-E2-210Q  
vs.  
SL07 (WT+Apal)

SL07-E2-198Q  
vs.  
SL07 (WT+Apal)

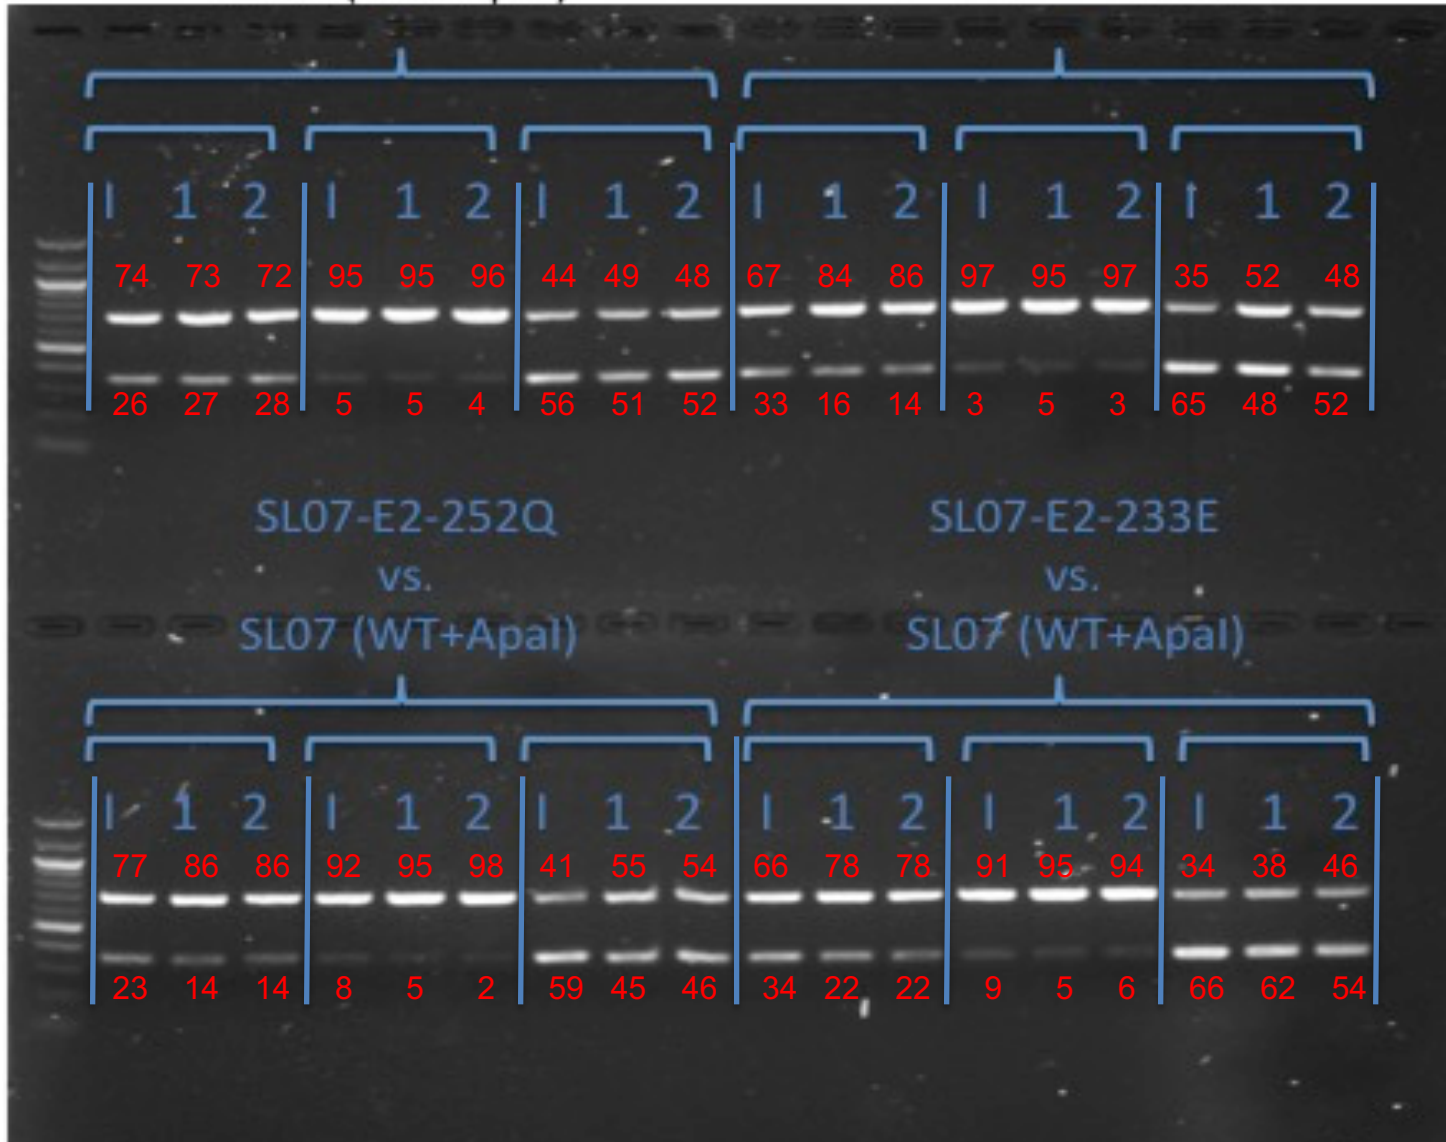

Figure S1: Passage of competing viruses in Vero Cells (Continued).

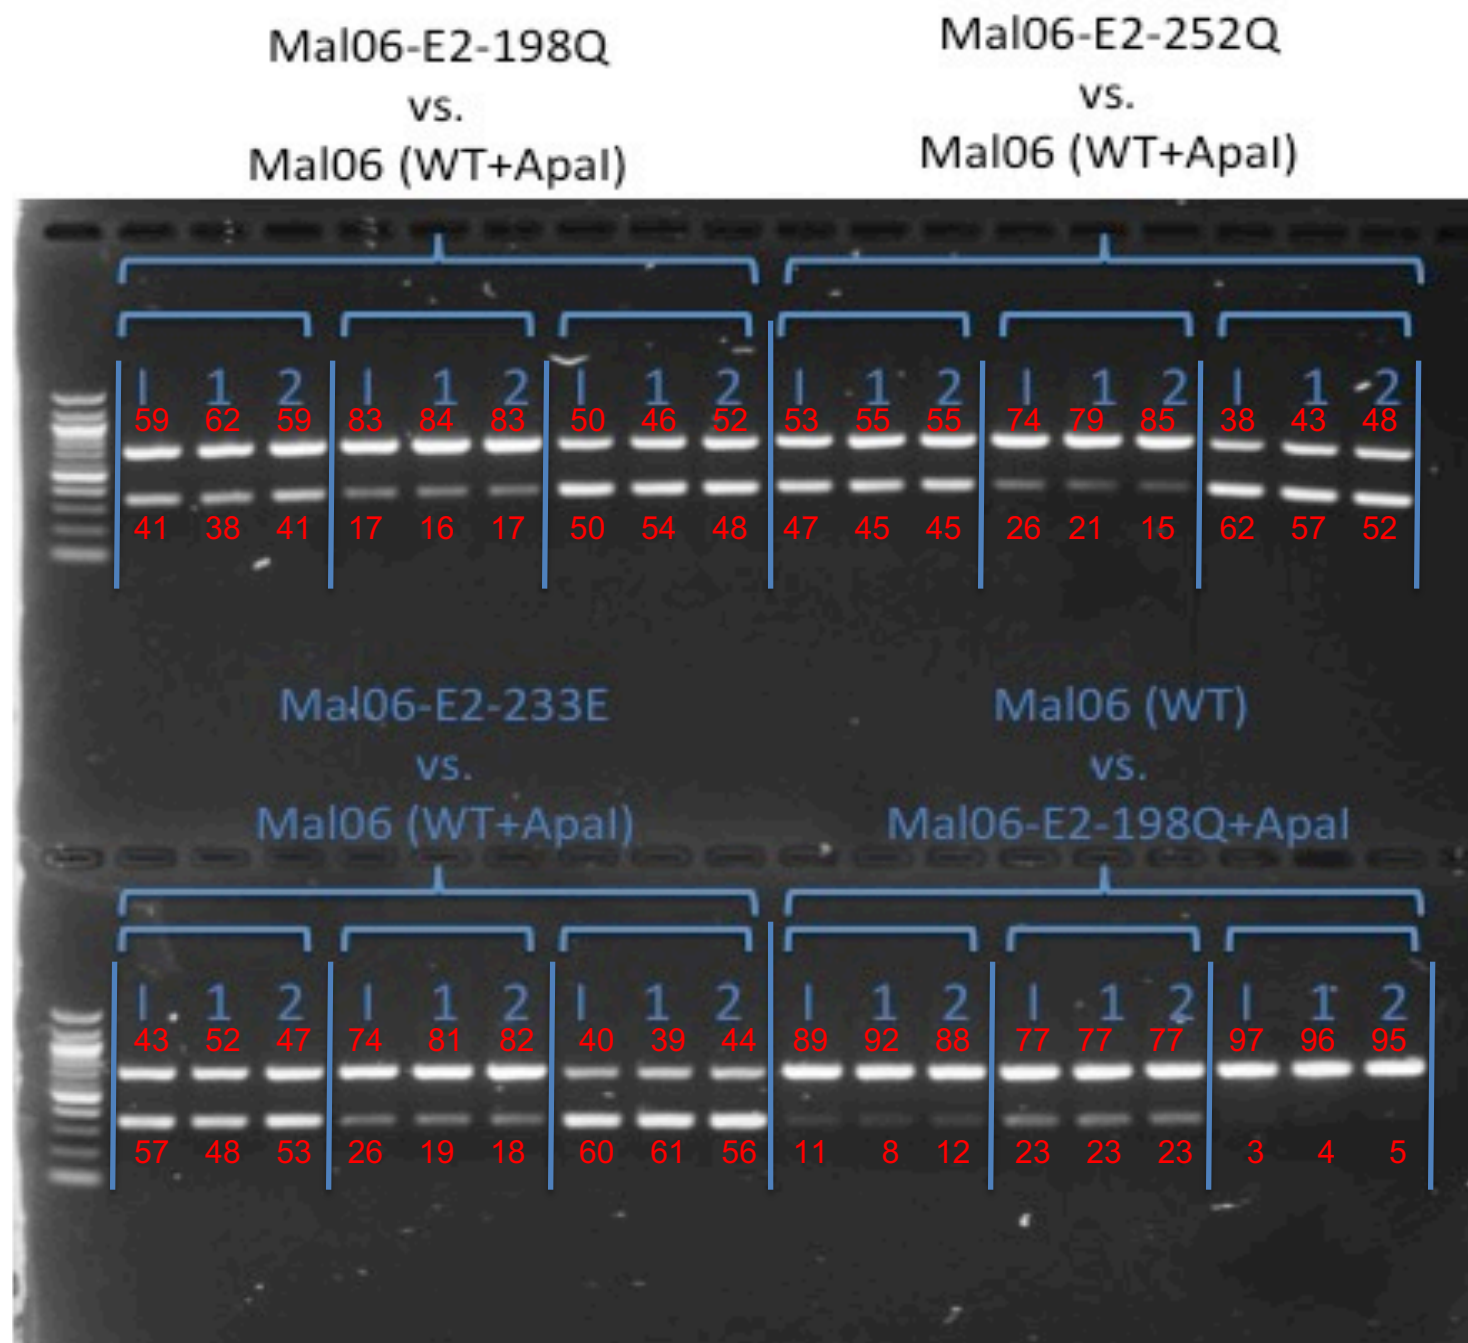

Supplement: mbio.02738-21-sf001.pdf [file mbio.02738-21-sf001.pdf]
