# Supplementary material for: Lineage Divergence and Vector-Specific Adaptation Have Driven Chikungunya Virus onto Multiple Adaptive Landscapes
Source: PubMed Central journal article supplement (PMC8576524; doi:10.1128/mbio.02738-21), 2021-11-09
Supplement: mbio.02738-21-st001.pdf [file mbio.02738-21-st001.pdf]

**S1 Table: Distance in angstroms between amino acid residues that differ between Mal06 and SL07 glycoproteins**

|     |     | E3 |     |     |     |     | E2  |     |     |     |     |     |     |     |     |     |     |     |     |     |     | E1  |         |     |     |     |     |
|-----|-----|----|-----|-----|-----|-----|-----|-----|-----|-----|-----|-----|-----|-----|-----|-----|-----|-----|-----|-----|-----|-----|---------|-----|-----|-----|-----|
|     |     | 18 | 33  | 44  | 60  | 62  | 2   | 5   | 118 | 157 | 164 | 194 | 198 | 205 | 207 | 210 | 233 | 248 | 252 | 255 | 72  | 98  | 196     | 203 | 211 | 225 |     |
| E3  | 18  |    | >20 | 15  | >20 | >20 | >20 | 15  | >20 | >20 | >20 | >20 | >20 | >20 | >20 | >20 | >20 | >20 | >20 | >20 | >20 | >20 | >20     | >20 | >20 | >20 |     |
|     | 33  |    |     | >20 | 15  | >20 | >20 | >20 | >20 | >20 | >20 | 17  | >20 | >20 | 15  | 10  | 12  | 13  | >20 | >20 | >20 | >20 | >20     | >20 | >20 | >20 |     |
|     | 44  |    |     |     | >20 | >20 | >20 | >20 | >20 | >20 | 15  | >20 | >20 | >20 | >20 | >20 | >20 | >20 | >20 | 12  | >20 | >20 | >20     | >20 | 15  | >20 |     |
|     | 60  |    |     |     |     | 10  | 12  | 15  | >20 | >20 | >20 | >20 | >20 | >20 | >20 | >20 | >20 | >20 | >20 | >20 | >20 | >20 | >20     | >20 | >20 | >20 |     |
|     | 62  |    |     |     |     |     | 15  | 15  | >20 | >20 | >20 | >20 | >20 | >20 | >20 | >20 | >20 | >20 | >20 | >20 | >20 | >20 | >20     | >20 | >20 | >20 |     |
| E2  | 2   |    |     |     |     |     |     | <6  | >20 | >20 | >20 | >20 | >20 | >20 | >20 | >20 | >20 | >20 | >20 | >20 | >20 | >20 | >20     | >20 | >20 | >20 |     |
|     | 5   |    |     |     |     |     |     |     | >20 | >20 | >20 | >20 | >20 | >20 | >20 | >20 | >20 | >20 | >20 | >20 | >20 | >20 | >20     | >20 | >20 | >20 |     |
|     | 118 |    |     |     |     |     |     |     |     | >20 | >20 | >20 | >20 | >20 | >20 | >20 | >20 | >20 | >20 | >20 | >20 | >20 | >20     | >20 | >20 | >20 |     |
|     | 157 |    |     |     |     |     |     |     |     |     | 11  | >20 | >20 | >20 | >20 | >20 | >20 | >20 | >20 | 15  | >20 | >20 | >20     | >20 | >20 | >20 |     |
|     | 164 |    |     |     |     |     |     |     |     |     |     | >20 | >20 | >20 | >20 | >20 | >20 | >20 | >20 | 10  | >20 | >20 | >20     | >20 | 15  | >20 |     |
|     | 194 |    |     |     |     |     |     |     |     |     |     |     | 15  | >20 | >20 | 12  | <10 | >20 | >20 | >20 | >20 | >20 | >20     | >20 | >20 | >20 |     |
|     | 198 |    |     |     |     |     |     |     |     |     |     |     |     | 15  | >20 | 18  | >20 | >20 | >20 | >20 | >20 | >20 | >20     | >20 | >20 | >20 |     |
|     | 205 |    |     |     |     |     |     |     |     |     |     |     |     |     | >20 | 12  | >20 | >20 | >20 | >20 | >20 | >20 | 18 flex | >20 | >20 | >20 | >20 |
|     | 207 |    |     |     |     |     |     |     |     |     |     |     |     |     |     | 14  | >20 | >20 | >20 | >20 | >20 | >20 | 15      | >20 | >20 | >20 | >20 |
|     | 210 |    |     |     |     |     |     |     |     |     |     |     |     |     |     |     | >20 | 16  | >20 | >20 | >20 | >20 | >20     | >20 | >20 | >20 |     |
|     | 233 |    |     |     |     |     |     |     |     |     |     |     |     |     |     |     |     |     | 10  | 15  | >20 | >20 | >20     | >20 | >20 | >20 | >20 |
|     | 248 |    |     |     |     |     |     |     |     |     |     |     |     |     |     |     |     |     |     | 10  | 15  | >20 | >20     | >20 | >20 | >20 | >20 |
|     | 252 |    |     |     |     |     |     |     |     |     |     |     |     |     |     |     |     |     |     |     | 12  | 17  | >20     | >20 | >20 | 16  | >20 |
| 255 |     |    |     |     |     |     |     |     |     |     |     |     |     |     |     |     |     |     |     |     | >20 | >20 | >20     | >20 | >20 | >20 |     |
| E1  | 72  |    |     |     |     |     |     |     |     |     |     |     |     |     |     |     |     |     |     |     |     | >20 | >20     | 15  | 13  | >20 |     |
|     | 98  |    |     |     |     |     |     |     |     |     |     |     |     |     |     |     |     |     |     |     |     |     | >20     | 15  | >20 | >20 |     |
|     | 196 |    |     |     |     |     |     |     |     |     |     |     |     |     |     |     |     |     |     |     |     |     |         | 10  | >20 | >20 |     |
|     | 203 |    |     |     |     |     |     |     |     |     |     |     |     |     |     |     |     |     |     |     |     |     |         |     | 12  | >20 |     |
|     | 211 |    |     |     |     |     |     |     |     |     |     |     |     |     |     |     |     |     |     |     |     |     |         |     |     | >20 |     |
|     | 225 |    |     |     |     |     |     |     |     |     |     |     |     |     |     |     |     |     |     |     |     |     |         |     |     |     |     |

The 35 amino acid residues that differ between IOL (SL07) and Asian (Mal06) CHIKV were analyzed *in silico* to measure their inter-residue distance using structure 3N40 in PyMol. Residues which differed between SL07 and Mal06 but were missing or incompletely resolved in 3N40 were excluded from analysis. Distances of <20 angstroms are highlighted in green.
